# Supplementary material for: Structural modulation induced intensity enhancement of full color spectra: a case of Ba3ZnTa2−xNbxO9:Eu3+ phosphors
Source: Royal Society of Chemistry journal article supplement (doi:10.1039/d0tc01201g), 2020-01-01
Supplement: d0tc01201g1.pdf [file d0tc01201g1.pdf]

## Electronic Supporting Information

### Structural Modulation Induced Intensity Enhancement of Full Color Spectra: A Case of $\text{Ba}_3\text{ZnTa}_{2-x}\text{Nb}_x\text{O}_9:\text{Eu}^{3+}$ Phosphors

Xiaohui Li,<sup>a,b</sup> Lei Zhou,<sup>a</sup> Junyu Hong,<sup>a</sup> Shiman He,<sup>a</sup> Xiping Jing,<sup>b</sup> Miroslav D. Dramićanin,<sup>c</sup> Jianxin Shi,<sup>a</sup> and Mingmei Wu<sup>a\*</sup>

<sup>a</sup> School of Marine Sciences/School of Chemistry, MOE Key Laboratory of Bioinorganic and Synthetic Chemistry, Sun Yat-Sen University, Zhuhai 519082 /Guangzhou 510275, People's Republic of China.

<sup>b</sup> Beijing National Laboratory for Molecular Sciences, the State Key Laboratory of Rare Earth Materials Chemistry and Applications, College of Chemistry and Molecular Engineering, Peking University, Beijing 100871, People's Republic of China.

<sup>c</sup> University of Belgrade, Vinča Institute of Nuclear Sciences, P.O. Box 522, 11001 Belgrade, Serbia

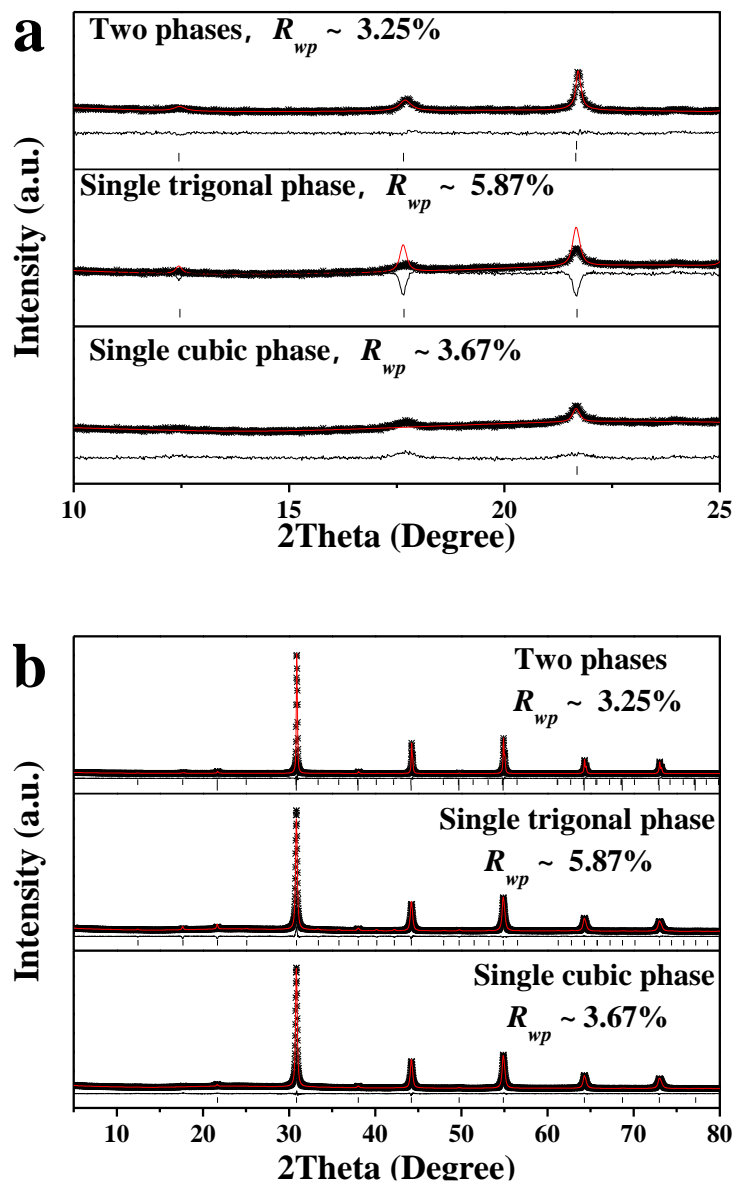

**Figure S1.** (a) Comparison of Rietveld refinements using single cubic/trigonal phase and both phases for XRD data of BZT obtained at 1100 °C. (b) And its corresponding enlargements in 10-25  $2\theta$  range.

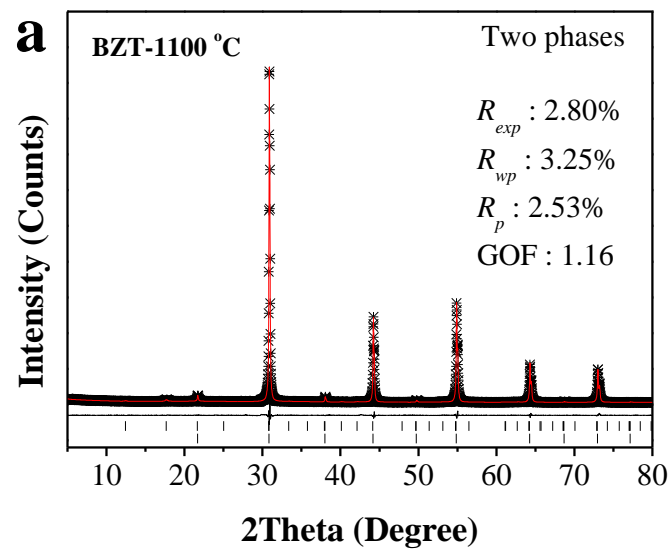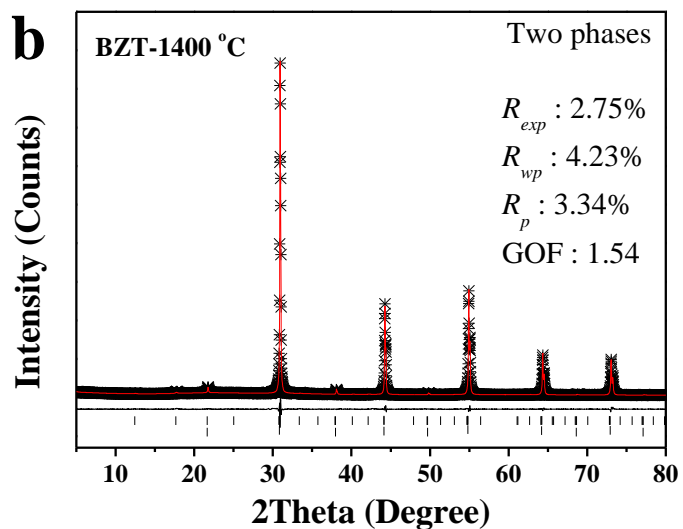

**Figure S2.** Rietveld refinements using two phases for XRD data of BZT obtained at 1100 °C (a) and 1400 °C (b), respectively. The refined mass percentages of the cubic phase for BZT obtained at 1100 °C and 1400 °C are 29.9% and 46.3%, respectively.

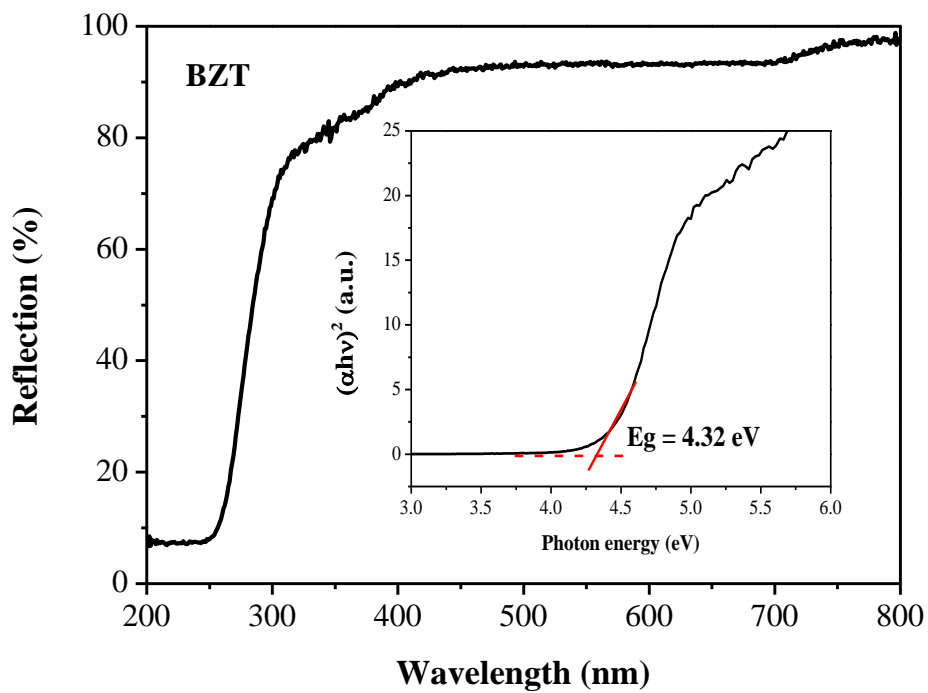

**Figure S3.** UV-Vis diffuse reflection spectrum of BZT sample. The inset is the  $(\alpha h\nu)^2$   $\sim$   $h\nu$  plot.

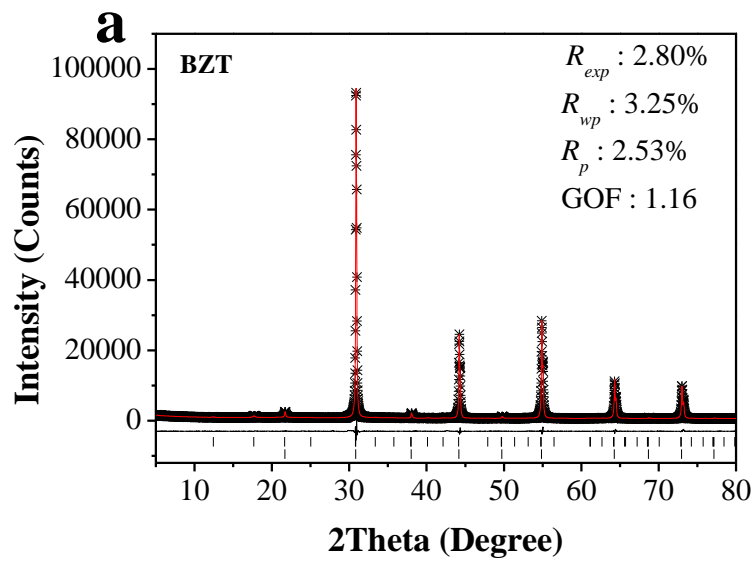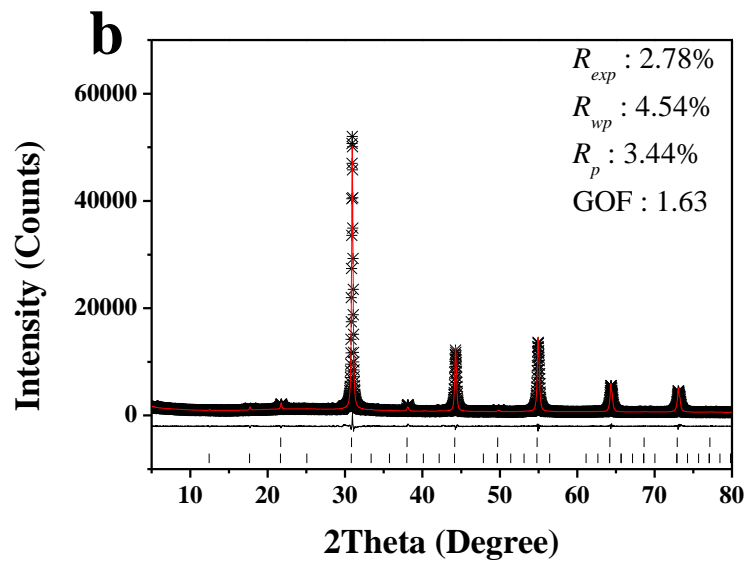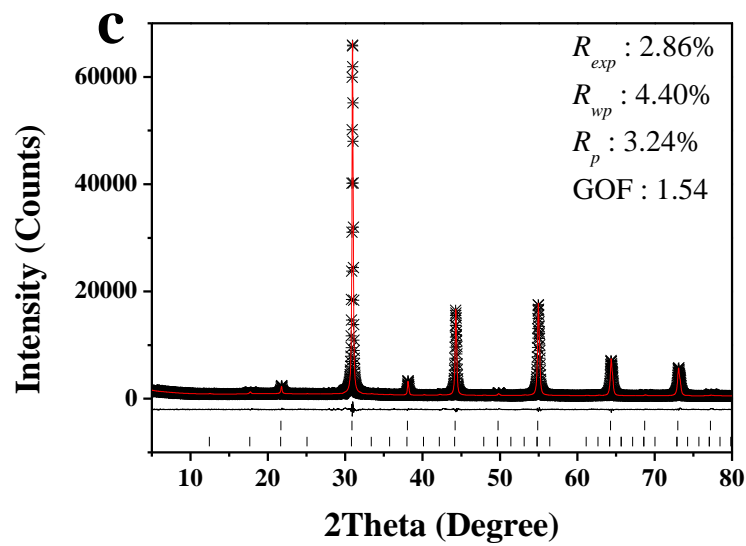

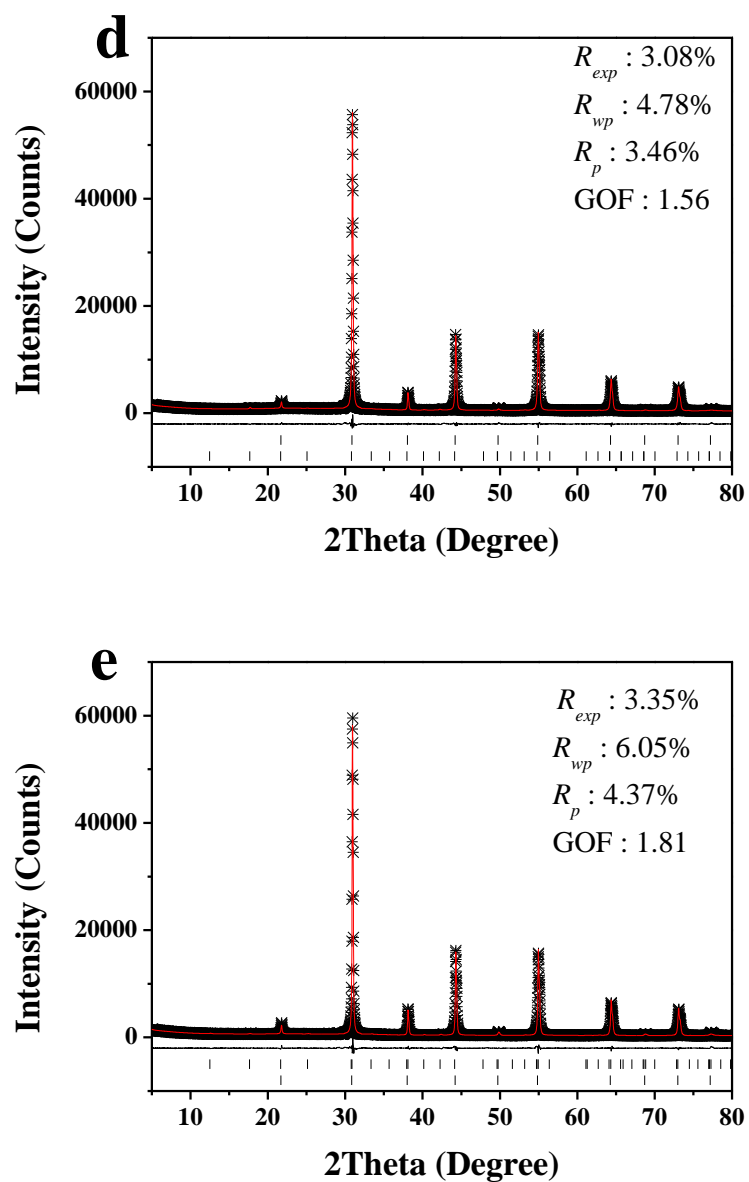

**Figure S4.** Quantitative Rietveld refinement plots of  $\text{Ba}_3\text{ZnTa}_{2-x}\text{Nb}_x\text{O}_9$  samples. (a)  $x = 0.0$ , (b)  $x = 0.5$ , (c)  $x = 1.0$ , (d)  $x = 1.5$  and (e)  $x = 2.0$ .

**Table S1. The refined structural parameters of B-site disordered cubic BZN\*.**

| Atom | Site | x   | y   | z   | Occ   | Biso( $\text{\AA}^2$ ) | BVS  |
|------|------|-----|-----|-----|-------|------------------------|------|
| Ba   | 1b   | 0.5 | 0.5 | 0.5 | 1     | 1                      | 2.29 |
| Zn   | 1a   | 0   | 0   | 0   | 0.333 | 1                      | 2.37 |
| Nb   | 1a   | 0   | 0   | 0   | 0.667 | 1                      | 4.14 |
| O    | 3d   | 0.5 | 0   | 0   | 1     | 1                      | 1.18 |

\*Space group:  $Pm-3m$ ,  $a = b = c = 4.0959(1)$   $\text{\AA}$ .  $Z = 1$

**Table S2. The refined structural parameters of B-site ordered trigonal BZN\***

| Atom | Site | x     | y     | z        | Occ | Biso( $\text{\AA}^2$ ) | BVS  |
|------|------|-------|-------|----------|-----|------------------------|------|
| Ba1  | 1a   | 0     | 0     | 0        | 1   | 1                      | 2.18 |
| Ba2  | 2d   | 1/3   | 2/3   | 0.633(3) | 1   | 1                      | 2.42 |
| Zn1  | 1b   | 0     | 0     | 1/2      | 1   | 1                      | 2.19 |
| Nb1  | 2d   | 1/3   | 2/3   | 0.166(3) | 1   | 1                      | 4.20 |
| O1   | 3e   | 0.5   | 0     | 0        | 1   | 1                      | 1.95 |
| O2   | 6i   | 0.169 | 0.169 | 0.334    | 1   | 1                      | 1.96 |

\*Space group:  $P-3m1$ ,  $a = b = 5.815(1)$   $\text{\AA}$ ,  $c = 7.105(3)$   $\text{\AA}$ ,  $Z = 1$ .

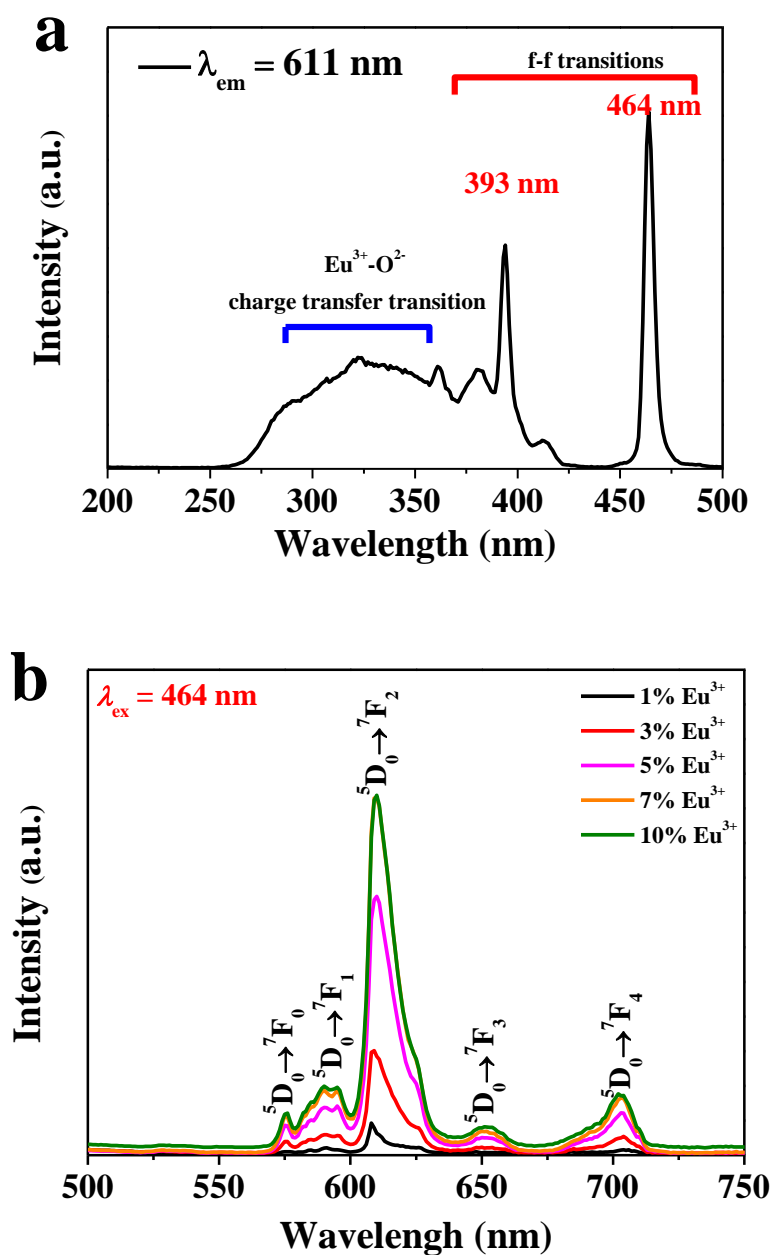

**Figure S5.** (a) PLE spectrum of Ba<sub>3-y</sub>Eu<sub>y</sub>ZnNb<sub>2</sub>O<sub>9</sub> (y = 10%) by monitoring 611 nm-emission. (b) Eu<sup>3+</sup>-Emission spectra ( $\lambda_{ex} = 464 \text{ nm}$ ) of Ba<sub>3-y</sub>Eu<sub>y</sub>ZnNb<sub>2</sub>O<sub>9</sub> (y = 1.0%, 3.0%, 5.0%, 7.0%, 10%) samples.



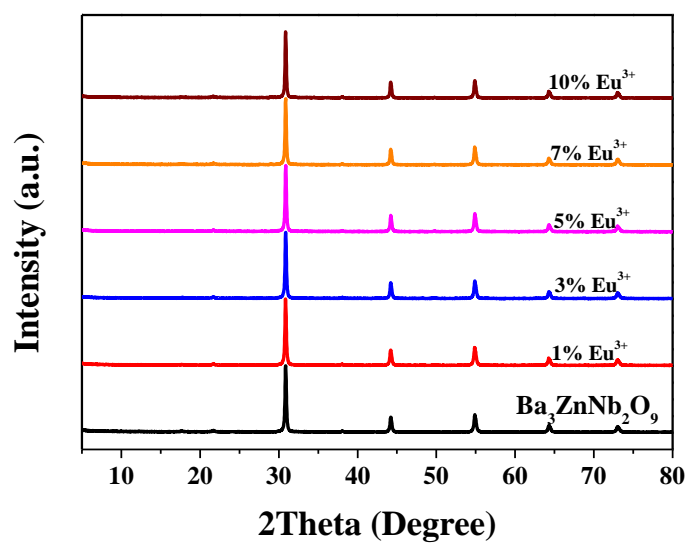

**Figure S6.** XRD patterns of Ba<sub>3-y</sub>Eu<sub>y</sub>ZnNb<sub>2</sub>O<sub>9</sub> (y =0, 1.0%, 3.0%, 5.0%, 7.0%, 10%) samples.

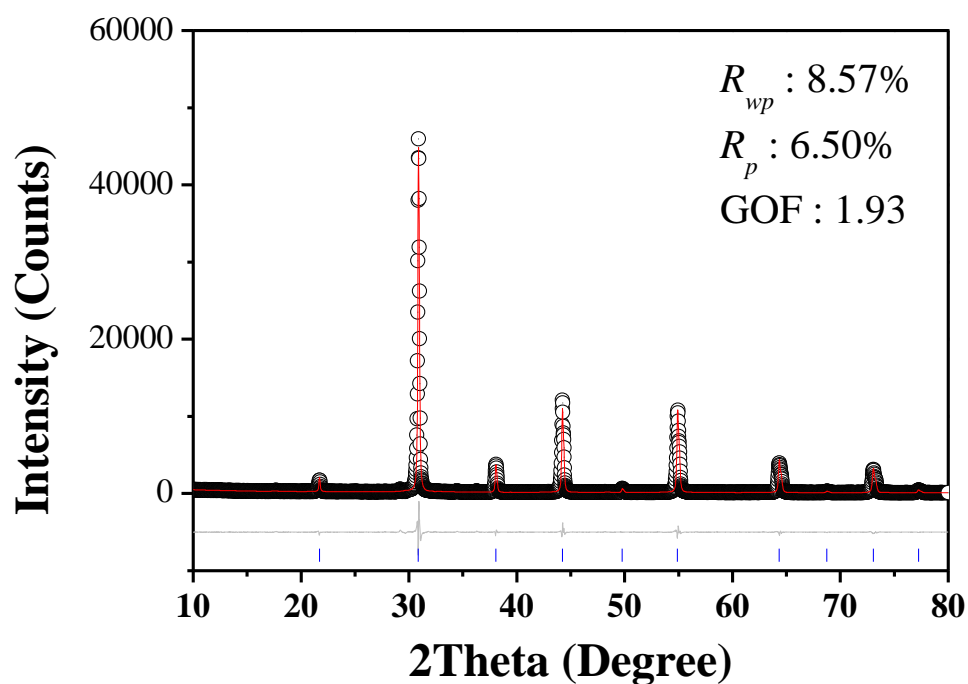

**Figure S7.** Rietveld refinement plots of  $\text{Ba}_{3-y}\text{Eu}_y\text{ZnNb}_2\text{O}_9$  ( $y = 0.1$ ) samples.

**Table S3.** The refined structural parameters of  $\text{Ba}_{3-y}\text{Eu}_y\text{ZnNb}_2\text{O}_9$  ( $y = 0.1$ )

| Atom | Site | x   | y   | z   | Occ      | Biso( $\text{\AA}^2$ ) |
|------|------|-----|-----|-----|----------|------------------------|
| Eu   | 1b   | 0.5 | 0.5 | 0.5 | 0.03 (1) | 1                      |
| Ba   | 1b   | 0.5 | 0.5 | 0.5 | 0.97 (1) | 1                      |
| Zn   | 1a   | 0   | 0   | 0   | 0.333    | 1                      |
| Nb   | 1a   | 0   | 0   | 0   | 0.667    | 1                      |
| O    | 3d   | 0.5 | 0   | 0   | 1        | 1                      |

\*Space group:  $Pm-3m$ ,  $a = b = c = 4.093$  (1)  $\text{\AA}$ .  $Z = 1$

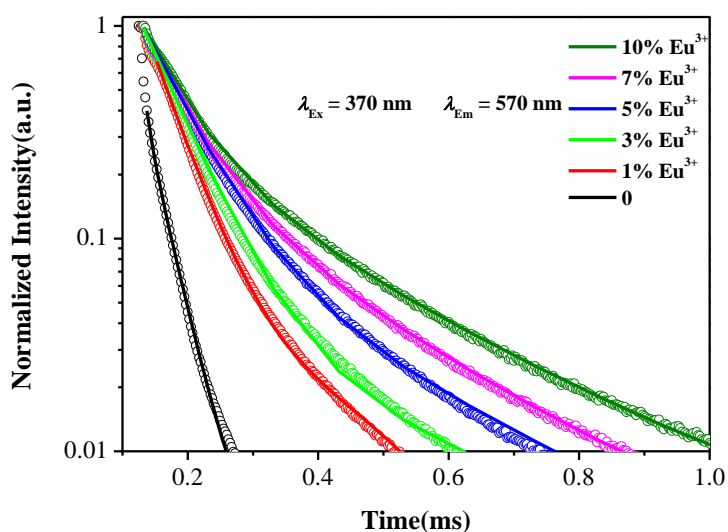

**Figure S8.** Luminescence decay curves ( $\lambda_{\text{ex}} = 370 \text{ nm}$ ,  $\lambda_{\text{em}} = 570 \text{ nm}$ ) of  $\text{Ba}_{3-y}\text{Eu}_y\text{ZnNb}_2\text{O}_9$  ( $y = 0.0, 1.0\%, 3.0\%, 5.0\%, 7.0\%, 10\%$ ) samples at room temperature.

The decay curves of  $\text{Ba}_{3-y}\text{Eu}_y\text{ZnNb}_2\text{O}_9$  ( $y = 0.0, 1.0\%, 3.0\%, 5.0\%, 7.0\%, 10\%$ ) samples can be well fitted with the second-order exponential decay mode by using equation:

$$I(t) = A_1 \exp(-t/\tau_1) + A_2 \exp(-t/\tau_2) \quad (1)$$

Where  $I$  is the luminescence intensity,  $A_1$  and  $A_2$  are constants,  $t$  is the time,  $\tau_1$  and  $\tau_2$  are rapid and slow lifetime values of exponential components, respectively. According to the equation (1), the  $A_1$ ,  $A_2$ ,  $\tau_1$  and  $\tau_2$  values can be obtained by fitting the decay curves. Thus, the average lifetimes ( $\tau^*$ ) of  $\text{Ba}_{3-y}\text{Eu}_y\text{ZnNb}_2\text{O}_9$  can be calculated as equation (2):

$$\tau^* = (A_1\tau_1^2 + A_2\tau_2^2) / (A_1\tau_1 + A_2\tau_2) \quad (2)$$

The average lifetimes of  $\text{Ba}_{3-y}\text{Eu}_y\text{ZnNb}_2\text{O}_9$  ( $y = 0.0, 1.0\%, 3.0\%, 5.0\%, 7.0\%, 10\%$ ) samples were calculated as  $8.2 \mu\text{s}$ ,  $57.5 \mu\text{s}$ ,  $71.3 \mu\text{s}$ ,  $85.8 \mu\text{s}$ ,  $91.2 \mu\text{s}$  and  $115.3 \mu\text{s}$ , respectively.

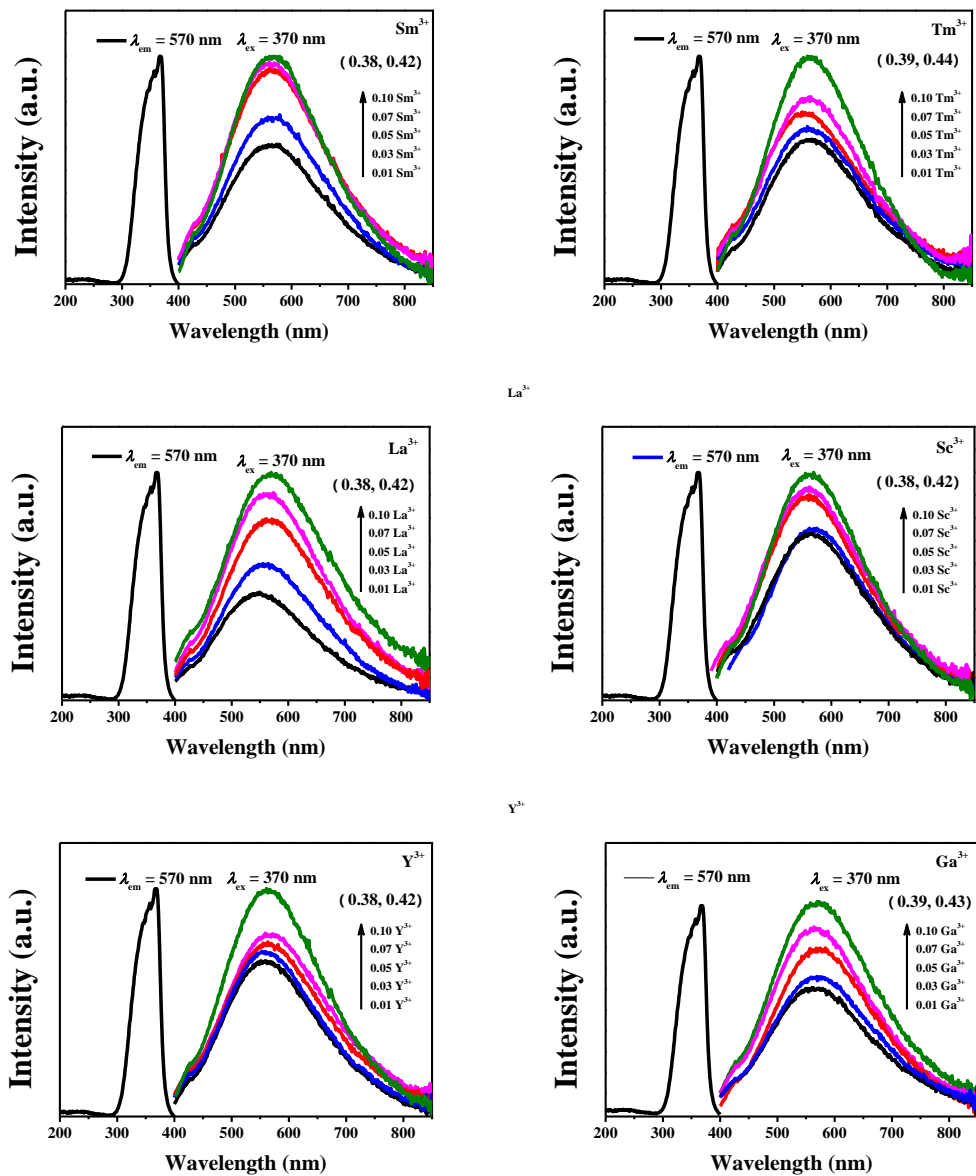

**Figure S9.** PL and PLE spectra of  $\text{Ba}_{3-y}\text{Ln}_y\text{ZnNb}_2\text{O}_9$  (Ln =  $\text{Sm}^{3+}$ ,  $\text{Tm}^{3+}$ ,  $\text{La}^{3+}$ ,  $\text{Sc}^{3+}$ ,  $\text{Y}^{3+}$ ,  $\text{Ga}^{3+}$ ,  $y = 0.01-0.10$ ) samples.

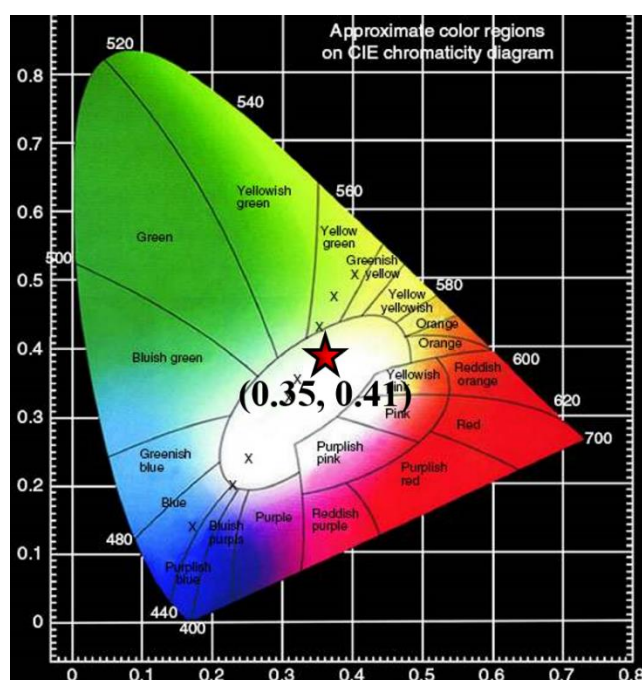

**Figure S10.** CIE chromaticity diagram of  $\text{Ba}_{3-y}\text{Eu}_y\text{ZnNb}_2\text{O}_9$  ( $y = 0.1$ ) phosphors.

For the fabrication of LED device, the single  $\text{Ba}_{3-x}\text{Eu}_x\text{ZnNb}_2\text{O}_9$  ( $x = 0.1$ ) phosphor sufficiently blended with silicone gel, and then a layer of this mixture was coated on a 370 nm-UV LED chip to prepare WLED devices. The electroluminescence (EL) spectra of WLED device were measured on a PMS-80 fluorescence spectrometer.
